# Supplementary material
Source: PubMed Central journal article supplement (PMC9918606)

Supplementary Table 1: Definitions of all variables accounted for in multivariable analyses

| Variable                            | Definition                                                                                                                                                                              |
|-------------------------------------|-----------------------------------------------------------------------------------------------------------------------------------------------------------------------------------------|
| Age                                 | Continuous                                                                                                                                                                              |
| Sex                                 | M/F                                                                                                                                                                                     |
| Race                                | White/Black/Asian/Other/Unknown                                                                                                                                                         |
| Hispanic Ethnicity                  | Binary                                                                                                                                                                                  |
| Weight Class                        | Non-overweight, overweight, obese class I-III                                                                                                                                           |
| Nicotine Dependence                 | ICD-10 code (F17.20), ICD-9 code (305.1)                                                                                                                                                |
| Hepatitis B                         | ICD-10 code (B18.0, B18.1), ICD-9 code (070.32, 070.32) or a positive HBV antigen test or nonzero DNA test                                                                              |
| Hepatitis C                         | ICD-10 code (B17.1, B18.2, B19.2, 070.70, 070.71), ICD-9 code (070.41, 070.44, 070.51, 070.54) or a positive HCV antibody test, nonzero RNA test, or genotype test with a valid result) |
| Homelessness                        | ICD-10 code (Z59.0), ICD-9 code (V60.0)                                                                                                                                                 |
| Psychotherapy                       | CPT4 code (90804-90815, 90826-90829, 90845, 90847, 90849, 90853, 90857, 90875, 90876, 99408)                                                                                            |
| Medication-assisted Therapy         | 3 prescriptions of disulfiram, acamprosate, naltrexone, gabapentin, topiramate or baclofen                                                                                              |
| Cannabis Use Disorder               | ICD-10 code (F12.1, F12.2), ICD-9 code (304.3, 305.2)                                                                                                                                   |
| Cocaine Use Disorder                | ICD-10 code (F14.1, F14.2), ICD-9 code (304.2, 305.6)                                                                                                                                   |
| Inhalant Use Disorder               | ICD-10 code (F18.1, F18.2), ICD-9 code (304.6, 305.9)                                                                                                                                   |
| Opioid Use Disorder                 | ICD-10 code (F11.1, F11.2), ICD-9 code (304.0, 305.5)                                                                                                                                   |
| Other Stimulant Use Disorder        | ICD-10 code (F15.1, F15.2), ICD-9 code (304.4, 305.7)                                                                                                                                   |
| Sedative Use Disorder               | ICD-10 code (F13.1, F13.2), ICD-9 code (304.1, 305.4)                                                                                                                                   |
| Anxiety Disorder                    | ICD-10 code (F40-F48), ICD-9 code (300, 308, 309)                                                                                                                                       |
| Specific Personality Disorder       | ICD-10 code (F60), ICD-9 code (301)                                                                                                                                                     |
| Mood Disorder                       | ICD-10 code (F30-F39), ICD-9 code (296, 301.1, 311)                                                                                                                                     |
| Schizophrenia Disorder              | ICD-10 code (F20-F29), ICD-9 code (295, 298.3, 298.3, 298.8)                                                                                                                            |
| Chronic Passive Congestion of Liver | ICD-10 code (K76.1), ICD-9 code (573.0)                                                                                                                                                 |
| Hemochromatosis                     | ICD-10 code (E83.11), ICD-9 code (275.01, 275.02, 275.03)                                                                                                                               |
| Autoimmune Hepatitis                | ICD-10 code (K75.4), ICD-9 code (571.42)                                                                                                                                                |
| Primary Biliary Cirrhosis           | ICD-10 code (K74.3)                                                                                                                                                                     |
| Secondary Biliary Cirrhosis         | ICD-10 code (K74.4)                                                                                                                                                                     |
| Biliary Cirrhosis                   | ICD-10 code (K74.5), ICD-9 code (571.6)                                                                                                                                                 |
| Alpha-1 antitrypsin deficiency      | ICD-10 code (E88.01), ICD-9 code (273.4)                                                                                                                                                |
| Nonalcoholic Steatohepatitis        | ICD-10 code (K75.81)                                                                                                                                                                    |

Supplementary Table 2: Multivariable Associations with the Receipt of Psychotherapy

| <b>Variable</b>                            | <b>Odds Ratio</b> | <b>95% CI</b>  | <b>P value</b> |
|--------------------------------------------|-------------------|----------------|----------------|
| <b>Age</b>                                 | 0.99              | 0.987 to 0.993 | <0.001         |
| <b>Male Sex</b>                            | 0.75              | 0.68 to 0.84   | <0.001         |
| <b>Asian Race</b>                          | 1.21              | 0.71 to 2.03   | 0.48           |
| <b>Black Race</b>                          | 0.78              | 0.64 to 0.95   | 0.01           |
| <b>Other Race</b>                          | 1.14              | 0.88 to 1.49   | 0.32           |
| <b>Unknown Race</b>                        | 1.04              | 0.79 to 1.36   | 0.80           |
| <b>Hispanic Ethnicity</b>                  | 1.05              | 0.75 to 1.47   | 0.76           |
| <b>Overweight</b>                          | 1.02              | 0.89 to 1.18   | 0.75           |
| <b>Obese Class I</b>                       | 1.16              | 0.99 to 1.36   | 0.06           |
| <b>Obese Class II</b>                      | 0.95              | 0.77 to 1.17   | 0.62           |
| <b>Obese Class III</b>                     | 1.01              | 0.77 to 1.31   | 0.95           |
| <b>Missing Weight</b>                      | 1.14              | 0.98 to 1.34   | 0.10           |
| <b>Nicotine Dependence</b>                 | 0.90              | 0.81 to 1.01   | 0.06           |
| <b>Hep B Positive</b>                      | 1.13              | 0.76 to 1.68   | 0.55           |
| <b>Hep C Positive</b>                      | 0.67              | 0.56 to 0.80   | <0.001         |
| <b>Homeless</b>                            | 0.53              | 0.44 to 0.63   | <0.001         |
| <b>Cannabis Use Disorder</b>               | 1.40              | 1.21 to 1.61   | <0.001         |
| <b>Cocaine Use Disorder</b>                | 0.96              | 0.82 to 1.13   | 0.65           |
| <b>Inhalant Use Disorder</b>               | 1.45              | 1.23 to 1.72   | <0.001         |
| <b>Opioid Use Disorder</b>                 | 1.21              | 1.04 to 1.40   | 0.01           |
| <b>Other Stimulant Use Disorder</b>        | 1.01              | 0.80 to 1.27   | 0.95           |
| <b>Sedative Use Disorder</b>               | 1.61              | 1.34 to 1.94   | <0.001         |
| <b>Anxiety Disorder</b>                    | 2.56              | 2.20 to 2.99   | <0.001         |
| <b>Specific Personality Disorder</b>       | 2.95              | 2.51 to 3.46   | <0.001         |
| <b>Mood Disorder</b>                       | 5.34              | 4.51 to 6.36   | <0.001         |
| <b>Schizophrenia</b>                       | 1.74              | 1.52 to 2.01   | <0.001         |
| <b>Chronic Passive Congestion of Liver</b> | 0.78              | 0.62 to 0.97   | 0.03           |
| <b>Hemochromatosis</b>                     | 0.78              | 0.51 to 1.18   | 0.26           |
| <b>Autoimmune Hepatitis</b>                | 0.61              | 0.20 to 1.65   | 0.35           |
| <b>Primary Biliary Cholangitis</b>         | 1.42              | 0.20 to 10.75  | 0.73           |
| <b>Secondary Biliary Cholangitis</b>       | 0.83              | 0.11 to 4.61   | 0.85           |
| <b>Biliary Cirrhosis</b>                   | 0.41              | 0.08 to 1.58   | 0.23           |
| <b>Alpha-1-antitrypsin Deficiency</b>      | 1.36              | 0.37 to 4.64   | 0.63           |
| <b>Nonalcoholic Steatohepatitis</b>        | 0.91              | 0.60 to 1.36   | 0.66           |
| <b>Alcohol Dependence</b>                  | 1.61              | 1.40 to 1.84   | <0.001         |
| <b>Both Alcohol Abuse and Dependence</b>   | 1.74              | 1.55 to 1.95   | <0.001         |
| <b>Medication-assisted Therapy</b>         | 1.61              | 1.45 to 1.79   | <0.001         |

Odds ratios for racial categories use white race as reference level, while BMI categories use the reference level of the non-overweight BMI class. AUD class (dependence, abuse or both) use alcohol abuse as a reference level.

Supplementary Table 3: Univariate associations with the development of ALD

| Variable                            | Odds Ratio | 95% CI          | P value |
|-------------------------------------|------------|-----------------|---------|
| Age                                 | 1.02       | 1.016 to 1.023  | <0.001  |
| Male Sex                            | 1.77       | 1.55 to 2.03    | <0.001  |
| Asian Race                          | 0.87       | 0.41 to 1.65    | 0.39    |
| Black Race                          | 0.79       | 0.61 to 1.02    | 0.07    |
| Other Race                          | 0.91       | 0.63 to 1.27    | 0.60    |
| Unknown Race                        | 0.78       | 0.56 to 1.06    | 0.12    |
| Hispanic Ethnicity                  | 1.20       | 0.86 to 1.64    | 0.27    |
| Overweight                          | 1.23       | 1.04 to 1.46    | 0.02    |
| Obese Class I                       | 1.21       | 1.00 to 1.46    | 0.05    |
| Obese Class II                      | 1.08       | 0.83 to 1.40    | 0.54    |
| Obese Class III                     | 1.19       | 0.85 to 1.62    | 0.29    |
| Missing Weight                      | 0.53       | 0.42 to 0.66    | <0.001  |
| Nicotine Dependence                 | 1.70       | 1.50 to 1.93    | < 0.001 |
| Hep B Positive                      | 3.51       | 2.54 to 4.83    | < 0.001 |
| Hep C Positive                      | 3.40       | 2.93 to 3.94    | <0.001  |
| Homeless                            | 2.22       | 1.87 to 2.62    | <0.001  |
| Cannabis Use Disorder               | 1.00       | 0.85 to 1.18    | 0.98    |
| Cocaine Use Disorder                | 1.464      | 1.25 to 1.71    | <0.001  |
| Inhalant Use Disorder               | 2.00       | 1.71 to 2.34    | <0.001  |
| Opioid Use Disorder                 | 1.88       | 1.63 to 2.16    | <0.001  |
| Other Stimulant Use Disorder        | 1.14       | 0.86 to 1.47    | 0.35    |
| Sedative Use Disorder               | 1.46       | 1.20 to 1.76    | <0.001  |
| Anxiety Disorder                    | 1.22       | 1.05 to 1.42    | 0.009   |
| Specific Personality Disorder       | 0.90       | 0.74 to 1.10    | 0.31    |
| Mood Disorder                       | 1.04       | 0.91 to 1.20    | 0.57    |
| Schizophrenia                       | 1.45       | 1.23 to 1.69    | <0.001  |
| Chronic Passive Congestion of Liver | 5.33       | 4.43 to 6.40    | <0.001  |
| Hemochromatosis                     | 5.37       | 3.81 to 7.50    | <0.001  |
| Autoimmune Hepatitis                | 7.56       | 3.47 to 16.5    | <0.001  |
| Primary Biliary Cholangitis         | 53.06      | 24.26 to 139.50 | <0.001  |
| Secondary Biliary Cholangitis       | 119.60     | 43.72 to 493.30 | <0.001  |
| Biliary Cirrhosis                   | 106.10     | 43.40 to 350.90 | <0.001  |
| Alpha-1-antitrypsin Deficiency      | 2.25       | 0.50 to 7.37    | 0.22    |
| Nonalcoholic Steatohepatitis        | 13.06      | 9.31 to 18.49   | <0.001  |
| Alcohol Dependence                  | 1.33       | 1.06 to 1.66    | 0.01    |
| Both Alcohol Abuse and Dependence   | 4.64       | 3.96 to 5.46    | <0.001  |
| Medication-assisted Therapy         | 0.62       | 0.54 to 0.70    | <0.001  |
| Psychotherapy                       | 0.41       | 0.35 to 0.48    | <0.001  |

Odds ratios for racial categories use white race as reference level, while BMI categories use the reference level of the non-overweight BMI class. AUD class (dependence, abuse or both) use alcohol abuse as a reference level.

Supplementary Table 4: Landmark analysis for the development of ALD among patients with AUD

| Landmark (days) | Patients Excluded (event before landmark), N | Patients Included, N | Patients treated, N | Patients Untreated, N | Events |
|-----------------|----------------------------------------------|----------------------|---------------------|-----------------------|--------|
| 30              | 484                                          | 9151                 | 2278                | 6873                  | 651    |
| 90              | 506                                          | 9129                 | 2418                | 6711                  | 629    |
| 360             | 573                                          | 9062                 | 2612                | 6450                  | 562    |

N = number

Events = ALD development

Journal Pre-proof

Supplementary Table 5: Univariate associations with hepatic decompensation

| Variable                            | Odds Ratio | 95% CI        | P value |
|-------------------------------------|------------|---------------|---------|
| Age                                 | 0.99       | 0.98 to 1.00  | 0.51    |
| Male Sex                            | 1.03       | 0.72 to 1.48  | 0.88    |
| Asian Race                          | 0.43       | 0.02 to 3.35  | 0.46    |
| Black Race                          | 0.43       | 0.17 to 0.93  | 0.04    |
| Other Race                          | 1.14       | 0.42 to 3.01  | 0.80    |
| Unknown Race                        | 0.69       | 0.25 to 1.71  | 0.43    |
| Hispanic Ethnicity                  | 0.93       | 0.38 to 2.19  | 0.87    |
| Overweight                          | 1.14       | 0.72 to 1.80  | 0.56    |
| Obese Class I                       | 1.12       | 0.68 to 1.85  | 0.66    |
| Obese Class II                      | 1.14       | 0.59 to 2.20  | 0.69    |
| Obese Class III                     | 0.70       | 0.28 to 1.64  | 0.42    |
| Missing Weight                      | 0.68       | 0.35 to 1.30  | 0.25    |
| Nicotine Dependence                 | 0.57       | 0.41 to 0.79  | <0.001  |
| Hep B Positive                      | 1.29       | 0.70 to 2.37  | 0.41    |
| Hep C Positive                      | 1.01       | 0.72 to 1.41  | 0.96    |
| Homeless                            | 0.60       | 0.38 to 0.95  | 0.03    |
| Cannabis Use Disorder               | 0.73       | 0.46 to 1.16  | 0.19    |
| Cocaine Use Disorder                | 0.61       | 0.40 to 0.93  | 0.02    |
| Inhalant Use Disorder               | 0.67       | 0.45 to 0.98  | 0.04    |
| Opioid Use Disorder                 | 0.56       | 0.39 to 0.80  | 0.002   |
| Other Stimulant Use Disorder        | 0.60       | 0.28 to 1.22  | 0.17    |
| Sedative Use Disorder               | 0.70       | 0.41 to 1.17  | 0.18    |
| Anxiety Disorder                    | 0.74       | 0.50 to 1.10  | 0.14    |
| Specific Personality Disorder       | 0.68       | 0.39 to 1.14  | 0.15    |
| Mood Disorder                       | 0.82       | 0.57 to 1.18  | 0.28    |
| Schizophrenia                       | 0.77       | 0.51 to 1.15  | 0.21    |
| Chronic Passive Congestion of Liver | 3.01       | 2.02 to 4.56  | <0.001  |
| Hemochromatosis                     | 1.23       | 0.63 to 2.38  | 0.54    |
| Autoimmune Hepatitis                | 6.86       | 1.10 to 131.8 | 0.08    |
| Primary Biliary Cholangitis         | 3.44       | 1.46 to 9.01  | 0.007   |
| Secondary Biliary Cholangitis       | 3.44       | 1.46 to 9.01  | 0.007   |
| Biliary Cirrhosis                   | 4.7        | 2.21 to 11.4  | <0.001  |
| Alpha-1-antitrypsin Deficiency      | 0.67       | 0.03 to 7.06  | 0.75    |
| Nonalcoholic Steatohepatitis        | 2.32       | 1.31 to 4.23  | 0.005   |
| Alcohol Dependence                  | 1.33       | 0.77 to 2.31  | 0.30    |
| Both Alcohol Abuse and Dependence   | 1.26       | 0.84 to 1.91  | 0.27    |
| Medication-assisted Therapy         | 0.44       | 0.30 to 0.64  | <0.001  |
| Psychotherapy                       | 0.41       | 0.35 to 0.48  | <0.001  |

Odds ratios for racial categories use white race as reference level, while BMI categories use the reference level of the non-overweight BMI class. AUD class (dependence, abuse or both) use alcohol abuse as a reference level.

Supplementary Table 6: Landmark analysis for the development of hepatic decompensation among patients with cirrhosis

| Landmark (days) | Patients Excluded (event before landmark), N | Patients Included, N | Patients treated, N | Patients Untreated, N | Events |
|-----------------|----------------------------------------------|----------------------|---------------------|-----------------------|--------|
| 30              | 339                                          | 545                  | 78                  | 467                   | 201    |
| 90              | 359                                          | 525                  | 90                  | 435                   | 181    |
| 360             | 425                                          | 459                  | 96                  | 363                   | 115    |

**N = number**

**Events = hepatic decompensation**

Journal Pre-proof

**Supplemental Figure 1: Responses to alcohol consumption questionnaire according to timing of questionnaire.** Bar graph displaying mean and 95% CI of responses to Mass General Brigham Biobank alcohol questionnaire. Patients in the “Before Therapy” group answered the questionnaire before they received psychotherapy. Patients in the “After Therapy” group answered the questionnaire after receiving psychotherapy. Patients in the “No Therapy” group did not receive psychotherapy. Each patient answered the questionnaire only once. Statistical analysis is ANOVA with Tukey tests for multiple comparisons. Patients that answered the questionnaire after therapy reported significantly lower drinking than either patients that did not receive therapy, or patients that answered the questionnaire before they initiated therapy. All patients in this analysis were diagnosed with AUD before they completed the questionnaire and had no diagnosis of ALD at the time that they completed the questionnaire. ns: not statistically significant, \*\*\*\*\*:  $p < 0.0001$

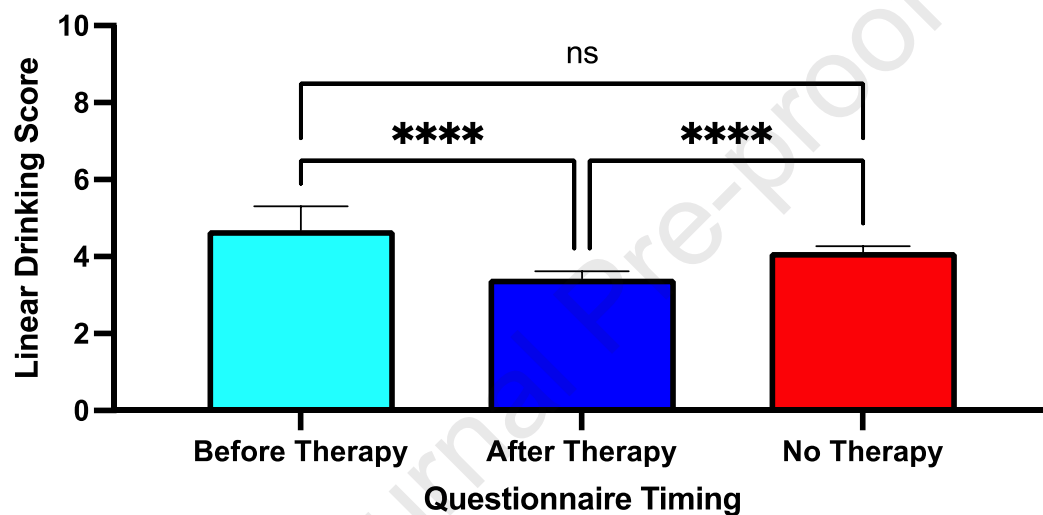

Supplement: NIHMS1829575-supplement-1.pdf [file NIHMS1829575-supplement-1.pdf]
